# Supplementary material for: Heterostructured Bi2O3/Bi2MoO6 nanocomposites: simple construction and enhanced visible-light photocatalytic performance
Source: Royal Society of Chemistry journal article supplement (doi:10.1039/c7ra02760e), 2017-01-01
Supplement: c7ra02760e1.pdf [file c7ra02760e1.pdf]

## Supporting Information

### Heterostructured $\text{Bi}_2\text{O}_3/\text{Bi}_2\text{MoO}_6$ nanocomposites: Simple construction and enhanced visible-light photocatalytic performance

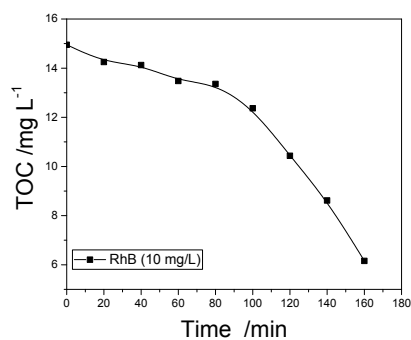

**Fig.S1** TOC values during RhB (10 mg/L, 250 mL) photocatalytic degradation process by  $\text{Bi}_2\text{O}_3/\text{Bi}_2\text{MoO}_6$  composites.

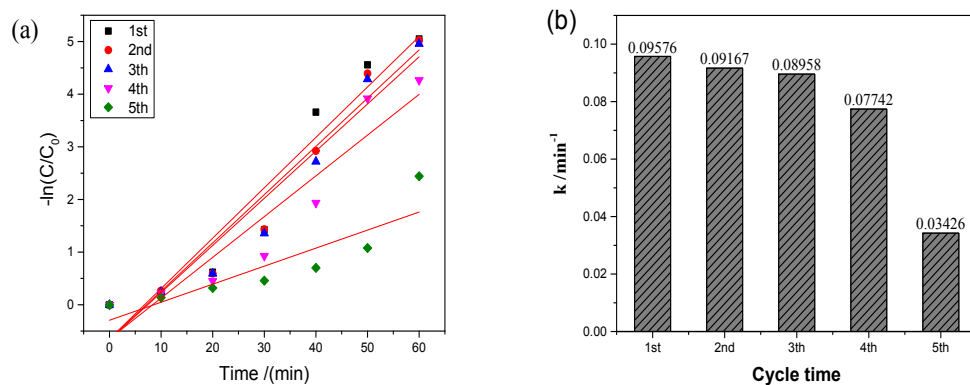

**Fig. S2** (a) Plot of  $\ln(C/C_0)$  versus irradiation time and (b) the histogram of the kinetic constant of the catalyst versus cycle time.

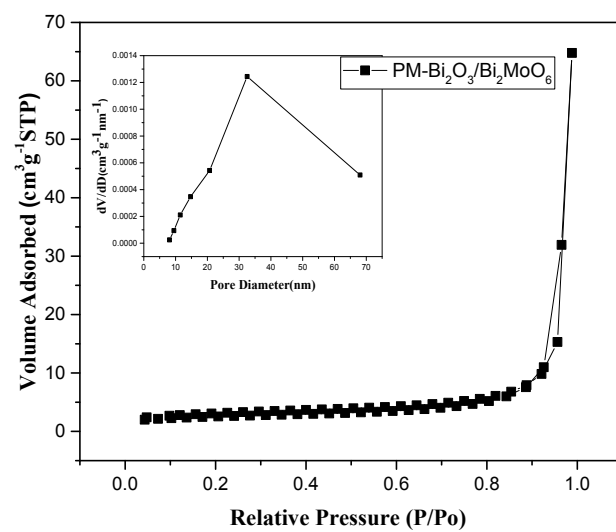

**Fig.S3**  $N_2$  adsorption–desorption isotherms and corresponding pore size distributions of PM- $Bi_2O_3/Bi_2MoO_6$ .
